# Supplementary material
Source: publisher figshare collection journal article supplement (https://acs.figshare.com/ndownloader/files/31716148)
Supplement: Supplementary file 1 [file 31716148]

**Supporting Information For:**

On-road NO<sub>x</sub> Emissions Evaluation of the Repair Effectiveness for Recalled Volkswagen Group Light-duty Diesel Vehicles in the United States

Gary A. Bishop

Department of Chemistry and Biochemistry, University of Denver, Denver, Colorado 80208, United States

\*Corresponding author: Gary A. Bishop, gbishop@du.edu

Number of pages: 8.

Number of tables: 3.

Number of figures: 2.

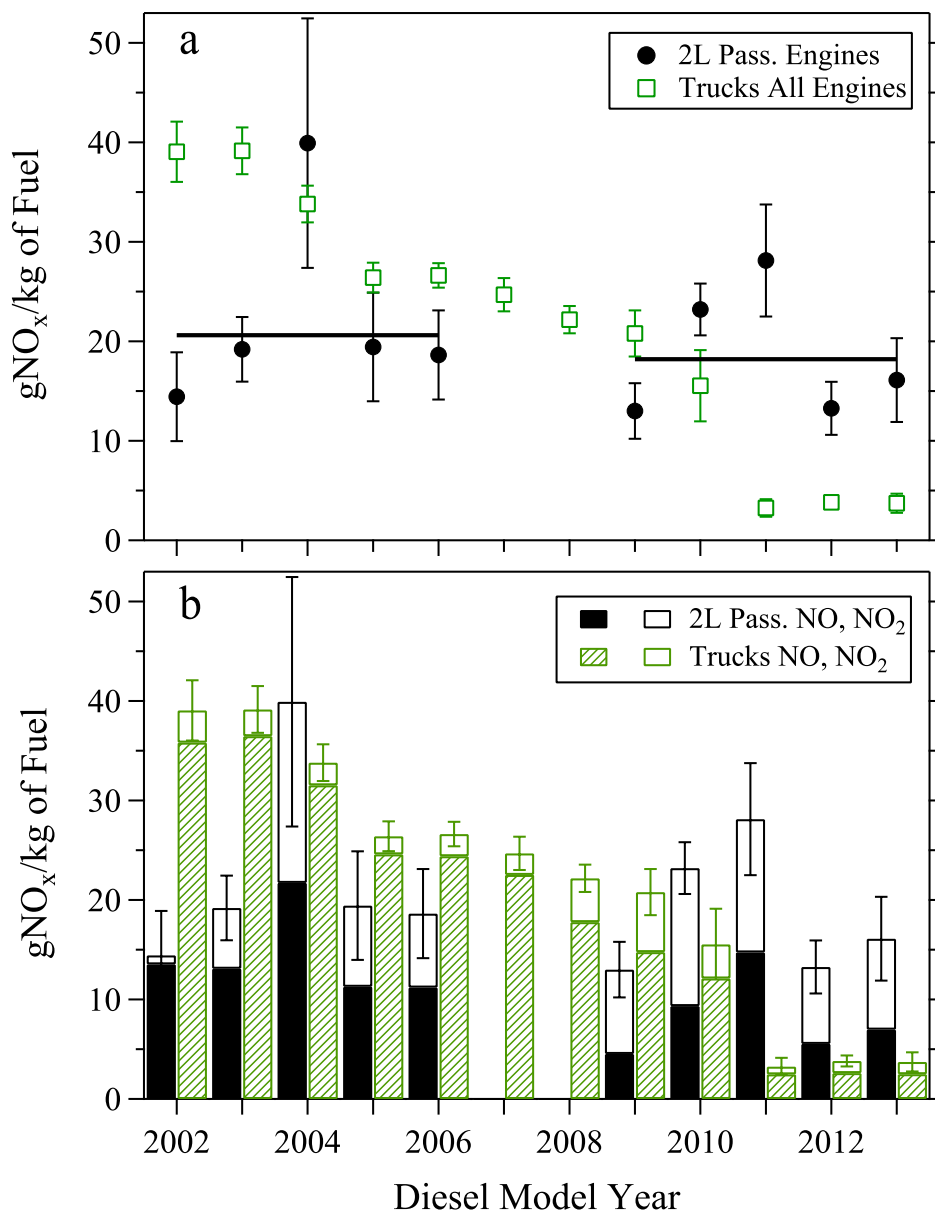

**Figure S1.** Diesel vehicle grams of NO<sub>x</sub> per kilogram of fuel emissions from a combined data set for the 2013 measurements in Denver, Los Angeles, and Tulsa by model year. The top panel graphs average grams of NO<sub>x</sub> per kilogram of fuel data for 2 L diesel passenger vehicles (circles) and diesel trucks (squares) as defined by the Polk VIN decoder. The black horizontal lines show the mean emission levels for the 2002–2006 (left) and 2009–2013 (right) 2 L diesel passenger vehicles, which are before and after Tier II/LEV II implementation. The bottom panel graphs the contribution that NO (converted to NO<sub>2</sub> equivalents) and NO<sub>2</sub> make to the NO<sub>x</sub> emissions for the same vehicle groupings. The uncertainties plotted are SEMs determined from the daily means for the 2 L passenger vehicles and diesel trucks. (Bishop and Stedman, *Environ. Sci. Technol.* **2015**, 49, (18), 11234-11240.)

## FEAT Calibration Cylinder Specifications

### Bottle 1:

6% carbon monoxide  
0.6% propane  
0.3% nitric oxide  
6% carbon dioxide  
nitrogen balance  
(Praxair, +/- 2%)

### Bottle 2:

0.05% nitrogen dioxide  
15% carbon dioxide  
air balance  
(Praxair, +/- 2%)

### Bottle 3:

0.1% ammonia  
0.6% propane  
nitrogen balance  
(Air Liquide, +/- 2%)

**Table S1.** Summary of Pre-repair Measurements Collected for Volkswagen, Audi and Porsche Diesels.

| Location            | Collection Dates                                                     | Total Records | VW Group (Model Years >=2009)             |                                     |                                                   |                                                   |
|---------------------|----------------------------------------------------------------------|---------------|-------------------------------------------|-------------------------------------|---------------------------------------------------|---------------------------------------------------|
|                     |                                                                      |               | Records <sup>a</sup><br>(Mean Model Year) | Mean <sup>b</sup><br>gNO/kg of Fuel | Mean <sup>c</sup><br>gNO <sub>2</sub> /kg of Fuel | Mean <sup>c</sup><br>gNO <sub>x</sub> /kg of Fuel |
| Chicago             | 9/11/2014<br>to<br>9/13/2014                                         | 20,395        | 74/71/71<br>(2012.7)                      | 3.79±0.27                           | 6.46±0.31                                         | 12.25±0.56                                        |
| Denver <sup>d</sup> | 12/12/2013<br>12/13/2013<br>1/3/2014                                 | 19,242        | 88/85/85<br>(2011.9)                      | 3.74±0.26                           | 10.91±1.89                                        | 16.77±2.25                                        |
| Denver <sup>d</sup> | 12/9/2015<br>12/10/2015<br>1/13/2016<br>1/27/2016<br>to<br>1/29/2016 | 23,297        | 66/65/65<br>(2012.9)                      | 3.30±0.62                           | 3.36±0.89                                         | 8.29±1.65                                         |
| Los Angeles         | 4/27/2013<br>to<br>5/4/2013                                          | 27,196        | 44/43/43<br>(2011.0)                      | 8.14±1.84                           | 7.81±1.39                                         | 19.87±3.31                                        |
| Los Angeles         | 3/28/2015<br>to<br>4/3/2015                                          | 22,124        | 62/62/62<br>(2012.7)                      | 6.56±0.88                           | 8.71±1.11                                         | 18.77±2.14                                        |
| Tulsa               | 9/30/2013<br>to<br>10/4/2013                                         | 21,115        | 29/23/23<br>(2012.2)                      | 2.99±1.26                           | 6.61±1.21                                         | 12.28±3.32                                        |
| Tulsa               | 9/14/2015<br>to<br>9/18/2015                                         | 19,601        | 52/52/52<br>(2012)                        | 2.08±0.74                           | 3.13±0.67                                         | 6.32±1.33                                         |
| Totals              |                                                                      | 152,970       | 415/401/401<br>(2012.2)                   | 4.31±0.58                           | 6.97±0.59                                         | 13.62±1.29                                        |

<sup>a</sup>Valid measurements for NO/NO<sub>2</sub>/NO<sub>x</sub>.

<sup>b</sup>grams of NO.

<sup>c</sup>grams of NO<sub>2</sub>.

<sup>d</sup>Winter measurements in Denver are only collected on dry and fair weather days and as such are usually not sequential.

Uncertainties are standard error of the mean determined using the daily means.

All of the databases can be accessed at <https://digitalcommons.du.edu/feat/>

**Table S2.** Summary of Post-repair Measurements Collected for all the Volkswagen, Audi and Porsche Diesels.

| Location            | Collection Dates                                 | Total Records | VW Group (Model Years >=2009)             |                                     |                                                   |                                                   |
|---------------------|--------------------------------------------------|---------------|-------------------------------------------|-------------------------------------|---------------------------------------------------|---------------------------------------------------|
|                     |                                                  |               | Records <sup>a</sup><br>(Mean Model Year) | Mean <sup>b</sup><br>gNO/kg of Fuel | Mean <sup>c</sup><br>gNO <sub>2</sub> /kg of Fuel | Mean <sup>c</sup><br>gNO <sub>x</sub> /kg of Fuel |
| Chicago             | 9/14/2020<br>to<br>9/18/2020                     | 19,025        | 61/61/61<br>(2014.1)                      | 2.26±0.68                           | 0.34±0.06                                         | 3.81±1.04                                         |
| Denver <sup>d</sup> | 1/16/2020<br>1/22/2020<br>1/24/2020<br>2/21/2020 | 19,909        | 33/32/32<br>(2013.1)                      | 0.33±0.10                           | 0.46±0.20                                         | 0.83±0.47                                         |
| Tulsa               | 9/9/2019<br>to<br>9/13/2019                      | 23,376        | 38/38/38<br>(2014.4)                      | 0.51±0.34                           | 0.22±0.07                                         | 1.00±0.54                                         |
| Totals              |                                                  | 62,310        | 132/131/131<br>(2013.9)                   | 1.28±0.37                           | 0.33±0.09                                         | 2.27±0.62                                         |

<sup>a</sup>Valid measurements for NO/NO<sub>2</sub>/NO<sub>x</sub>.

<sup>b</sup>grams of NO.

<sup>c</sup>grams of NO<sub>2</sub>.

<sup>d</sup>Winter measurements in Denver are only collected on dry and fair weather days and as such are usually not sequential.

Uncertainties are standard error of the mean determined using the daily means.

All of the databases can be accessed at <https://digitalcommons.du.edu/feat/>

**Table S3.** Number and Percent Total of NO<sub>x</sub> Measurements by Model Year for each Repair Category from Figure 1.

| Model Year         | Number of NO <sub>x</sub> Measurements |                                              |                                            |
|--------------------|----------------------------------------|----------------------------------------------|--------------------------------------------|
|                    | Pre-Repair<br>(% Total)                | Post-Repair<br>All Measurements<br>(% Total) | Post-Repair<br>Fully Repaired<br>(% Total) |
| 2009               | 32 (8.0%)                              | 0                                            | 0                                          |
| 2010               | 42 (10.5%)                             | 6 (4.6%)                                     | 5 (4.4%)                                   |
| 2011               | 53 (13.2%)                             | 12 (9.2%)                                    | 12 (10.5%)                                 |
| 2012               | 67 (16.7%)                             | 18 (13.7%)                                   | 17 (14.9%)                                 |
| 2013               | 105 (26.2%)                            | 18 (13.7%)                                   | 18 (15.8%)                                 |
| 2014               | 79 (19.7%)                             | 16 (12.2%)                                   | 15 (13.2%)                                 |
| 2015               | 22 (5.5%)                              | 38 (29.0%)                                   | 24 (21.0%)                                 |
| 2016               | 1 (0.2%)                               | 1 (.8%)                                      | 1 (0.9%)                                   |
| 2017               | 0                                      | 22 (16.8%)                                   | 22 (19.3%)                                 |
| Total Measurements | 401                                    | 131                                          | 114                                        |

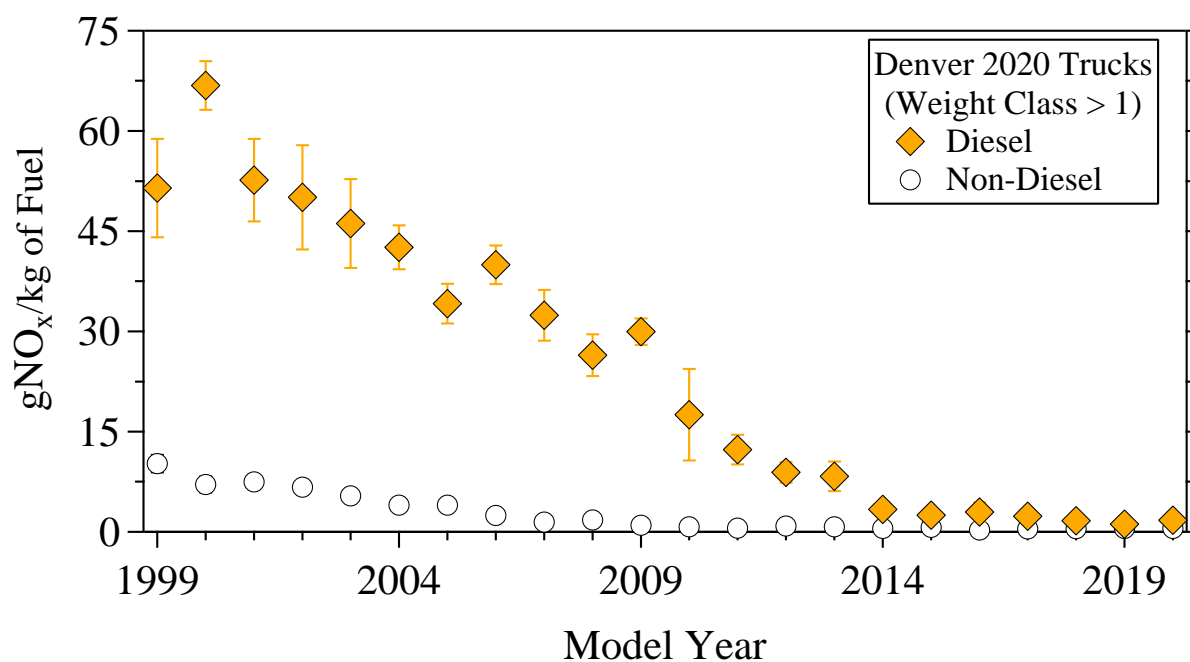

**Figure S2.** Fuel specific NO<sub>x</sub> emissions by model year for the Denver 2020 diesel (diamonds) and non-diesel trucks (circles) in weight classes larger than 1. Uncertainties are standard error of the mean calculated using the daily means for each model year.

Literature Cited:

1. Bishop, G. A.; Stedman, D. H., Reactive Nitrogen Species Emission Trends in Three Light-/Medium-Duty United States Fleets., *Environ. Sci. Technol.* **2015**, 49, (18), 11234-11240, DOI: 10.1021/acs.est.5b02392.
